# Supplementary material for: A study of tuberculosis in road traffic-killed badgers on the edge of the British bovine TB epidemic area
Source: PubMed Central journal article supplement (PMC6283848; doi:10.1038/s41598-018-35652-5), 2018-12-06
Supplement: 41598_2018_35652_MOESM1_ESM.pdf [file 41598_2018_35652_MOESM1_ESM.pdf]

**A study of tuberculosis in road traffic-killed badgers on the edge of the British bovine TB epidemic area**

Elsa Sandoval Barron<sup>1\*</sup>, Ben Swift<sup>2</sup>, Julian Chantrey<sup>3</sup>, Robert Christley<sup>3</sup>, Richard Gardner<sup>4</sup>, Chris Jewell<sup>5</sup>, Ian McGrath<sup>6</sup>, Andrew Mitchell<sup>7</sup>, Colman O’Cathail<sup>1</sup>,  
Alison Prosser<sup>7</sup>, Sue Ridout<sup>8</sup>, Gonzalo Sanchez-Cabezudo<sup>8</sup>, Noel Smith<sup>7</sup>, Dorina Timofte<sup>3</sup>, Nicola Williams<sup>3</sup>, Malcolm Bennett<sup>1\*</sup>

School Veterinary Medicine and Science, University of Nottingham<sup>1</sup>, Royal Veterinary College<sup>2</sup>, Institutes of Infection and Global Health and Veterinary Science, University of Liverpool<sup>3</sup>, Cheshire Wildlife Trust<sup>4</sup>, Lancaster University<sup>5</sup>, Grange Farm<sup>6</sup>, APHA, Weybridge<sup>7</sup>, APHA Northern Region<sup>8</sup>







|     |            |           |           |   |   |      |   |        |    |   |  |  |  |  |   |  |
|-----|------------|-----------|-----------|---|---|------|---|--------|----|---|--|--|--|--|---|--|
| 90  | 13/11/2014 | 53.271591 | -2.238900 | F | A | 15   | + | SB0129 | 25 | + |  |  |  |  | + |  |
| 91  | 14/11/2014 | 53.061900 | -2.609300 | F | Y | 11   |   |        |    |   |  |  |  |  |   |  |
| 92  | 18/11/2014 | 53.230752 | -2.305848 | M | A | 13.5 |   |        |    |   |  |  |  |  |   |  |
| 93  | 19/11/2014 | 53.249013 | -2.654189 | M | A | 15   |   |        |    |   |  |  |  |  |   |  |
| 95  | 09/12/2014 | 53.250900 | -2.088400 | F | A | 6    |   |        |    |   |  |  |  |  |   |  |
| 96  | 09/12/2014 | 53.275500 | -2.322200 | F | A | 14   | + | SB0129 | 25 | + |  |  |  |  | + |  |
| 97  | 20/01/2015 | 53.069212 | -2.633437 | M | Y | 12.5 |   |        |    |   |  |  |  |  |   |  |
| 98  | 20/01/2015 | 53.105857 | -2.848439 | F | Y | 8.5  |   |        |    |   |  |  |  |  |   |  |
| 99  | 23/01/2015 | 53.018888 | -2.367947 | M | A | 10   |   |        |    |   |  |  |  |  |   |  |
| 102 | 29/01/2015 | 53.270986 | -2.667939 | M | A | 12.5 | + | SB0129 | 25 | + |  |  |  |  |   |  |

Sex was classified as Male (M), Female (F) or Other (O). All carcasses in the O category were considered males

Age was classified as Adult (A) over a year old and Juvenile (Y) under a year old
